# Supplementary material
Source: publisher figshare collection journal article supplement (https://acs.figshare.com/ndownloader/files/4589089)
Supplement: Supplementary file 1 [file 4589089]

 
data_erk3569 
 
_audit_creation_method            SHELXL-97 
_chemical_name_systematic 
; 
 ? 
; 
_chemical_name_common             ? 
_chemical_melting_point           ? 
_chemical_formula_moiety          ? 
_chemical_formula_sum 
 'C43 H48 Cl4 N3 P Ru' 
_chemical_formula_weight          880.68 
 
loop_ 
 _atom_type_symbol 
 _atom_type_description 
 _atom_type_scat_dispersion_real 
 _atom_type_scat_dispersion_imag 
 _atom_type_scat_source 
 'C'  'C'   0.0033   0.0016 
 'International Tables Vol C Tables 4.2.6.8 and 6.1.1.4' 
 'H'  'H'   0.0000   0.0000 
 'International Tables Vol C Tables 4.2.6.8 and 6.1.1.4' 
 'N'  'N'   0.0061   0.0033 
 'International Tables Vol C Tables 4.2.6.8 and 6.1.1.4' 
 'P'  'P'   0.1023   0.0942 
 'International Tables Vol C Tables 4.2.6.8 and 6.1.1.4' 
 'Cl'  'Cl'   0.1484   0.1585 
 'International Tables Vol C Tables 4.2.6.8 and 6.1.1.4' 
 'Ru'  'Ru'  -1.2594   0.8363 
 'International Tables Vol C Tables 4.2.6.8 and 6.1.1.4' 
 
_symmetry_cell_setting            'monoclinic' 
_symmetry_space_group_name_H-M    'P21/n'
 
loop_ 
 _symmetry_equiv_pos_as_xyz 
 'x, y, z' 
 '-x+1/2, y+1/2, -z+1/2' 
 '-x, -y, -z' 
 'x-1/2, -y-1/2, z-1/2' 
 
_cell_length_a                    9.688(1) 
_cell_length_b                    11.853(1) 
_cell_length_c                    36.224(1) 
_cell_angle_alpha                 90.00 
_cell_angle_beta                  93.24(1) 
_cell_angle_gamma                 90.00 
_cell_volume                      4153.0(6) 
_cell_formula_units_Z             4 
_cell_measurement_temperature     198(2) 
_cell_measurement_reflns_used     9965 
_cell_measurement_theta_min       0.41
_cell_measurement_theta_max       27.88
 
_exptl_crystal_description        'plate' 
_exptl_crystal_colour             'red'
_exptl_crystal_size_max           0.35 
_exptl_crystal_size_mid           0.35 
_exptl_crystal_size_min           0.03 
_exptl_crystal_density_meas       ? 
_exptl_crystal_density_diffrn     1.409 
_exptl_crystal_density_method     'not measured' 
_exptl_crystal_F_000              1816 
_exptl_absorpt_coefficient_mu     0.707 
_exptl_absorpt_correction_type    'multi-scan' 
_exptl_absorpt_correction_T_min   0.7898 
_exptl_absorpt_correction_T_max   0.9791 
_exptl_absorpt_process_details    
 'Denzo (Otwinowski, Borek, Majewski & Minor, 2003)'
 
_exptl_special_details 
; 
 ? 
; 
 
_diffrn_ambient_temperature       198(2) 
_diffrn_radiation_wavelength      0.71073 
_diffrn_radiation_type            MoK\a 
_diffrn_radiation_source          'rotating anode Nonius FR591' 
_diffrn_radiation_monochromator   graphite 
_diffrn_measurement_device_type   'Nonius KappaCCD'
_diffrn_measurement_method        '\w and  \f scans'
_diffrn_detector_area_resol_mean  ? 
_diffrn_standards_number          ? 
_diffrn_standards_interval_count  ? 
_diffrn_standards_interval_time   ? 
_diffrn_standards_decay_%         ? 
_diffrn_reflns_number             42153 
_diffrn_reflns_av_R_equivalents   0.051 
_diffrn_reflns_av_sigmaI/netI     0.0344 
_diffrn_reflns_limit_h_min        -11 
_diffrn_reflns_limit_h_max        12 
_diffrn_reflns_limit_k_min        -15
_diffrn_reflns_limit_k_max        15 
_diffrn_reflns_limit_l_min        -47 
_diffrn_reflns_limit_l_max        47 
_diffrn_reflns_theta_min          1.13 
_diffrn_reflns_theta_max          28.23 
_reflns_number_total              10013 
_reflns_number_gt                 8176 
_reflns_threshold_expression      >2sigma(I) 
 
_computing_data_collection        'Collect (Nonius B.V., 1998)'
_computing_cell_refinement        'Collect (Nonius B.V., 1998)'
_computing_data_reduction         'Denzo-SMN (Otwinowski & Minor, 1997)'
_computing_structure_solution     'SHELXS-97 (Sheldrick, 1990)' 
_computing_structure_refinement   'SHELXL-97 (Sheldrick, 1997)' 
_computing_molecular_graphics     'XP (BrukerAXS, 2000)'
_computing_publication_material   'SHELXL-97 (Sheldrick, 1997)'
 
_refine_special_details 
; 
 Refinement of F^2^ against ALL reflections.  The weighted R-factor wR and 
 goodness of fit S are based on F^2^, conventional R-factors R are based 
 on F, with F set to Zero for negative F^2^. The threshold expression of 
 F^2^ > 2sigma(F^2^) is used only for calculating R-factors(gt) etc. and is 
 not relevant to the choice of reflections for refinement.  R-factors based 
 on F^2^ are statistically about twice as large as those based on F, and R- 
 factors based on all data will be even larger. 
 Solvent molecule refined with split positions using geometrical (SADI)
 and thermal (EADP) restraints.
; 
 
_refine_ls_structure_factor_coef  Fsqd  
_refine_ls_matrix_type            full 
_refine_ls_weighting_scheme       calc  
_refine_ls_weighting_details 
 'calc w=1/[\s^2^(Fo^2^)+(0.0763P)^2^+6.3563P] where P=(Fo^2^+2Fc^2^)/3' 
_atom_sites_solution_primary      direct 
_atom_sites_solution_secondary    difmap 
_atom_sites_solution_hydrogens    geom 
_refine_ls_hydrogen_treatment     'riding' 
_refine_ls_extinction_method      none 
_refine_ls_extinction_coef        ? 
_refine_ls_number_reflns          10013 
_refine_ls_number_parameters      491 
_refine_ls_number_restraints      31 
_refine_ls_R_factor_all           0.0620 
_refine_ls_R_factor_gt            0.0456 
_refine_ls_wR_factor_ref          0.1353 
_refine_ls_wR_factor_gt           0.1225 
_refine_ls_goodness_of_fit_ref    1.030 
_refine_ls_restrained_S_all       1.066 
_refine_ls_shift/su_max           0.001 
_refine_ls_shift/su_mean          0.000 
 
loop_ 
 _atom_site_label 
 _atom_site_type_symbol 
 _atom_site_fract_x 
 _atom_site_fract_y 
 _atom_site_fract_z 
 _atom_site_U_iso_or_equiv 
 _atom_site_adp_type 
 _atom_site_occupancy 
 _atom_site_symmetry_multiplicity 
 _atom_site_calc_flag 
 _atom_site_refinement_flags 
 _atom_site_disorder_assembly 
 _atom_site_disorder_group 
Ru Ru -0.76567(2) 0.143557(19) 0.147117(7) 0.01937(8) Uani 1 1 d . . . 
Cl1 Cl -1.00357(8) 0.08914(7) 0.12873(2) 0.03163(18) Uani 1 1 d . . . 
Cl2 Cl -0.72156(9) -0.05438(6) 0.16472(2) 0.03078(18) Uani 1 1 d . . . 
N1 N -0.5804(3) 0.1633(2) 0.16829(8) 0.0228(5) Uani 1 1 d . . . 
C2 C -0.4720(3) 0.1307(3) 0.14827(10) 0.0286(7) Uani 1 1 d . . . 
C3 C -0.3392(4) 0.1263(3) 0.16510(12) 0.0372(8) Uani 1 1 d . . . 
H3 H -0.2630 0.1049 0.1513 0.045 Uiso 1 1 d R . . 
C4 C -0.3191(4) 0.1539(3) 0.20210(12) 0.0400(9) Uani 1 1 d . . . 
H4 H -0.2283 0.1536 0.2135 0.048 Uiso 1 1 d R . . 
C5 C -0.4310(4) 0.1824(3) 0.22276(11) 0.0343(8) Uani 1 1 d . . . 
H5 H -0.4178 0.2001 0.2483 0.041 Uiso 1 1 d R . . 
C6 C -0.5627(3) 0.1835(3) 0.20518(9) 0.0251(6) Uani 1 1 d . . . 
C7 C -0.5125(3) 0.1035(3) 0.10975(10) 0.0315(7) Uani 1 1 d . . . 
C8 C -0.4029(4) 0.0564(4) 0.08574(12) 0.0499(11) Uani 1 1 d . . . 
H8A H -0.3804 -0.0210 0.0934 0.075 Uiso 1 1 d R . . 
H8B H -0.3196 0.1033 0.0885 0.075 Uiso 1 1 d R . . 
H8C H -0.4377 0.0567 0.0598 0.075 Uiso 1 1 d R . . 
N9 N -0.6414(3) 0.1173(2) 0.09925(8) 0.0276(6) Uani 1 1 d . . . 
C10 C -0.6814(4) 0.1038(3) 0.05995(10) 0.0338(8) Uani 1 1 d . . . 
C11 C -0.7284(4) -0.0004(4) 0.04666(11) 0.0414(9) Uani 1 1 d . . . 
C12 C -0.7748(5) -0.0074(4) 0.00960(12) 0.0533(11) Uani 1 1 d . . . 
H12 H -0.8098 -0.0772 0.0002 0.064 Uiso 1 1 d R . . 
C13 C -0.7715(5) 0.0833(5) -0.01373(12) 0.0556(12) Uani 1 1 d . . . 
H13 H -0.8060 0.0767 -0.0387 0.067 Uiso 1 1 d R . . 
C14 C -0.7189(5) 0.1838(4) -0.00053(11) 0.0503(11) Uani 1 1 d . . . 
H14 H -0.7135 0.2457 -0.0170 0.060 Uiso 1 1 d R . . 
C15 C -0.6725(4) 0.1976(4) 0.03623(10) 0.0392(9) Uani 1 1 d . . . 
C16 C -0.7245(5) -0.1071(4) 0.07014(12) 0.0478(10) Uani 1 1 d . . . 
H16 H -0.6848 -0.0872 0.0954 0.057 Uiso 1 1 d R . . 
C17 C -0.6305(7) -0.1965(5) 0.05362(17) 0.0732(16) Uani 1 1 d . . . 
H17A H -0.6242 -0.2625 0.0699 0.110 Uiso 1 1 d R . . 
H17B H -0.5381 -0.1646 0.0513 0.110 Uiso 1 1 d R . . 
H17C H -0.6693 -0.2192 0.0292 0.110 Uiso 1 1 d R . . 
C18 C -0.8695(6) -0.1551(4) 0.07388(16) 0.0632(14) Uani 1 1 d . . . 
H18A H -0.9268 -0.0997 0.0860 0.095 Uiso 1 1 d R . . 
H18B H -0.8625 -0.2240 0.0888 0.095 Uiso 1 1 d R . . 
H18C H -0.9117 -0.1729 0.0493 0.095 Uiso 1 1 d R . . 
C19 C -0.6157(4) 0.3107(4) 0.04937(11) 0.0432(9) Uani 1 1 d . . . 
H19 H -0.6367 0.3178 0.0760 0.052 Uiso 1 1 d R . . 
C20 C -0.6807(5) 0.4124(4) 0.02939(14) 0.0572(12) Uani 1 1 d . . . 
H20A H -0.6506 0.4817 0.0422 0.086 Uiso 1 1 d R . . 
H20B H -0.7816 0.4063 0.0293 0.086 Uiso 1 1 d R . . 
H20C H -0.6522 0.4145 0.0039 0.086 Uiso 1 1 d R . . 
C21 C -0.4588(5) 0.3188(5) 0.04748(16) 0.0632(13) Uani 1 1 d . . . 
H21A H -0.4322 0.3004 0.0225 0.095 Uiso 1 1 d R . . 
H21B H -0.4144 0.2658 0.0652 0.095 Uiso 1 1 d R . . 
H21C H -0.4290 0.3958 0.0538 0.095 Uiso 1 1 d R . . 
C22 C -0.6936(3) 0.1883(3) 0.22349(9) 0.0254(6) Uani 1 1 d . . . 
C23 C -0.6955(4) 0.2106(3) 0.26418(10) 0.0349(8) Uani 1 1 d . . . 
H23A H -0.7597 0.2724 0.2685 0.052 Uiso 1 1 d R . . 
H23B H -0.6023 0.2315 0.2737 0.052 Uiso 1 1 d R . . 
H23C H -0.7253 0.1425 0.2769 0.052 Uiso 1 1 d R . . 
N24 N -0.8022(3) 0.1663(2) 0.20179(7) 0.0225(5) Uani 1 1 d . . . 
C25 C -0.9375(3) 0.1504(3) 0.21806(10) 0.0276(7) Uani 1 1 d . . . 
H25A H -1.0126 0.1686 0.1993 0.033 Uiso 1 1 d R . . 
H25B H -0.9451 0.2026 0.2392 0.033 Uiso 1 1 d R . . 
C26 C -0.9539(3) 0.0321(3) 0.23095(10) 0.0320(7) Uani 1 1 d . . . 
H26 H -0.9311 -0.0272 0.2148 0.038 Uiso 1 1 d R . . 
C27 C -0.9978(4) 0.0046(4) 0.26332(12) 0.0452(10) Uani 1 1 d . . . 
H27A H -1.0214 0.0622 0.2801 0.054 Uiso 1 1 d R . . 
H27B H -1.0061 -0.0725 0.2700 0.054 Uiso 1 1 d R . . 
P P -0.83137(8) 0.33054(6) 0.13671(2) 0.02103(16) Uani 1 1 d . . . 
C31 C -0.6996(3) 0.4432(3) 0.14013(9) 0.0268(6) Uani 1 1 d . . . 
C32 C -0.5619(3) 0.4198(3) 0.13431(10) 0.0304(7) Uani 1 1 d . . . 
H32 H -0.5340 0.3440 0.1308 0.036 Uiso 1 1 d R . . 
C33 C -0.4639(4) 0.5059(3) 0.13344(11) 0.0397(9) Uani 1 1 d . . . 
H33 H -0.3706 0.4886 0.1290 0.048 Uiso 1 1 d R . . 
C34 C -0.5035(5) 0.6170(4) 0.13939(13) 0.0469(10) Uani 1 1 d . . . 
H34 H -0.4372 0.6758 0.1386 0.056 Uiso 1 1 d R . . 
C35 C -0.6388(5) 0.6413(3) 0.14629(12) 0.0426(9) Uani 1 1 d . . . 
H35 H -0.6649 0.7171 0.1507 0.051 Uiso 1 1 d R . . 
C36 C -0.7364(4) 0.5564(3) 0.14659(10) 0.0335(7) Uani 1 1 d . . . 
H36 H -0.8293 0.5744 0.1513 0.040 Uiso 1 1 d R . . 
C41 C -0.9472(3) 0.3794(2) 0.17166(9) 0.0225(6) Uani 1 1 d . . . 
C42 C -0.8914(3) 0.4141(3) 0.20638(9) 0.0267(6) Uani 1 1 d . . . 
H42 H -0.7940 0.4200 0.2106 0.032 Uiso 1 1 d R . . 
C43 C -0.9775(4) 0.4395(3) 0.23476(10) 0.0338(8) Uani 1 1 d . . . 
H43 H -0.9390 0.4609 0.2584 0.041 Uiso 1 1 d R . . 
C44 C -1.1194(4) 0.4336(3) 0.22828(11) 0.0393(9) Uani 1 1 d . . . 
H44 H -1.1784 0.4517 0.2475 0.047 Uiso 1 1 d R . . 
C45 C -1.1756(4) 0.4015(3) 0.19408(11) 0.0367(8) Uani 1 1 d . . . 
H45 H -1.2732 0.3985 0.1897 0.044 Uiso 1 1 d R . . 
C46 C -1.0900(3) 0.3728(3) 0.16587(10) 0.0286(7) Uani 1 1 d . . . 
H46 H -1.1295 0.3495 0.1425 0.034 Uiso 1 1 d R . . 
C51 C -0.9327(3) 0.3623(3) 0.09349(9) 0.0272(7) Uani 1 1 d . . . 
C52 C -0.9608(4) 0.2778(3) 0.06768(10) 0.0321(7) Uani 1 1 d . . . 
H52 H -0.9249 0.2042 0.0721 0.039 Uiso 1 1 d R . . 
C53 C -1.0406(4) 0.2993(4) 0.03527(11) 0.0437(9) Uani 1 1 d . . . 
H53 H -1.0587 0.2407 0.0178 0.052 Uiso 1 1 d R . . 
C54 C -1.0941(5) 0.4048(4) 0.02858(12) 0.0492(10) Uani 1 1 d . . . 
H54 H -1.1500 0.4190 0.0067 0.059 Uiso 1 1 d R . . 
C55 C -1.0658(5) 0.4911(4) 0.05401(13) 0.0555(12) Uani 1 1 d . . . 
H55 H -1.1026 0.5644 0.0494 0.067 Uiso 1 1 d R . . 
C56 C -0.9851(5) 0.4699(3) 0.08599(11) 0.0437(9) Uani 1 1 d . . . 
H56 H -0.9648 0.5294 0.1030 0.052 Uiso 1 1 d R . . 
C60 C -0.1216(15) -0.1786(8) 0.1512(5) 0.063(2) Uani 0.456(4) 1 d PD A 1 
H60A H -0.0371 -0.1360 0.1591 0.076 Uiso 0.456(4) 1 calc PR A 1 
H60B H -0.1432 -0.1648 0.1245 0.076 Uiso 0.456(4) 1 calc PR A 1 
Cl11 Cl -0.2612(10) -0.1392(6) 0.1774(3) 0.166(4) Uani 0.456(4) 1 d PDU A 1 
Cl12 Cl -0.0999(3) -0.3238(2) 0.16012(15) 0.0998(17) Uani 0.456(4) 1 d PDU A 1 
C61 C -0.0939(13) -0.1925(11) 0.1480(2) 0.063(2) Uani 0.544(4) 1 d PD A 2 
H61A H -0.0160 -0.2443 0.1544 0.076 Uiso 0.544(4) 1 calc PR A 2 
H61B H -0.0548 -0.1170 0.1432 0.076 Uiso 0.544(4) 1 calc PR A 2 
Cl13 Cl -0.2005(5) -0.1837(5) 0.18562(10) 0.1020(15) Uani 0.544(4) 1 d PDU A 2 
Cl14 Cl -0.1843(3) -0.2412(4) 0.10745(9) 0.1118(16) Uani 0.544(4) 1 d PDU A 2 
 
loop_ 
 _atom_site_aniso_label 
 _atom_site_aniso_U_11 
 _atom_site_aniso_U_22 
 _atom_site_aniso_U_33 
 _atom_site_aniso_U_23 
 _atom_site_aniso_U_13 
 _atom_site_aniso_U_12 
Ru 0.01792(13) 0.01839(13) 0.02216(13) 0.00033(9) 0.00426(8) 0.00134(8) 
Cl1 0.0228(4) 0.0321(4) 0.0400(5) -0.0010(3) 0.0022(3) -0.0039(3) 
Cl2 0.0386(4) 0.0198(3) 0.0346(4) 0.0009(3) 0.0077(3) 0.0047(3) 
N1 0.0194(12) 0.0212(12) 0.0280(14) 0.0040(10) 0.0037(10) 0.0010(9) 
C2 0.0204(15) 0.0308(17) 0.0352(18) 0.0062(14) 0.0067(13) 0.0038(12) 
C3 0.0210(16) 0.0386(19) 0.053(2) 0.0088(17) 0.0087(15) 0.0037(14) 
C4 0.0230(16) 0.046(2) 0.050(2) 0.0124(18) -0.0023(15) -0.0032(15) 
C5 0.0301(17) 0.0343(18) 0.038(2) 0.0073(15) -0.0043(14) -0.0059(14) 
C6 0.0257(15) 0.0198(14) 0.0297(17) 0.0038(12) 0.0001(12) -0.0008(12) 
C7 0.0266(16) 0.0356(18) 0.0333(18) 0.0021(14) 0.0112(13) 0.0050(14) 
C8 0.035(2) 0.066(3) 0.050(2) -0.006(2) 0.0174(18) 0.0153(19) 
N9 0.0280(14) 0.0282(14) 0.0274(14) -0.0024(11) 0.0094(11) 0.0048(11) 
C10 0.0312(17) 0.042(2) 0.0290(18) -0.0053(15) 0.0093(14) 0.0051(15) 
C11 0.044(2) 0.047(2) 0.034(2) -0.0090(17) 0.0081(16) 0.0007(17) 
C12 0.063(3) 0.060(3) 0.037(2) -0.012(2) 0.003(2) -0.006(2) 
C13 0.063(3) 0.076(3) 0.028(2) -0.010(2) 0.0040(19) 0.008(2) 
C14 0.055(3) 0.068(3) 0.029(2) 0.003(2) 0.0123(18) 0.014(2) 
C15 0.041(2) 0.050(2) 0.0282(18) 0.0015(16) 0.0123(15) 0.0118(17) 
C16 0.064(3) 0.043(2) 0.037(2) -0.0097(18) 0.0073(19) -0.003(2) 
C17 0.098(4) 0.054(3) 0.070(4) -0.005(3) 0.020(3) 0.018(3) 
C18 0.078(4) 0.055(3) 0.058(3) -0.013(2) 0.014(3) -0.014(2) 
C19 0.053(2) 0.046(2) 0.032(2) 0.0053(17) 0.0133(17) 0.0029(19) 
C20 0.063(3) 0.053(3) 0.057(3) 0.020(2) 0.015(2) -0.001(2) 
C21 0.053(3) 0.068(3) 0.070(3) -0.003(3) 0.016(2) -0.003(2) 
C22 0.0314(16) 0.0180(14) 0.0268(16) 0.0020(12) 0.0024(12) 0.0000(12) 
C23 0.041(2) 0.0376(19) 0.0259(18) -0.0006(15) 0.0007(14) 0.0007(15) 
N24 0.0250(13) 0.0192(12) 0.0238(13) 0.0026(10) 0.0051(10) 0.0017(10) 
C25 0.0249(15) 0.0298(16) 0.0290(17) 0.0032(13) 0.0096(13) 0.0029(12) 
C26 0.0290(17) 0.0281(17) 0.0396(19) 0.0034(14) 0.0093(14) -0.0026(13) 
C27 0.045(2) 0.045(2) 0.047(2) 0.0152(18) 0.0097(18) -0.0083(18) 
P 0.0209(4) 0.0201(4) 0.0223(4) 0.0009(3) 0.0025(3) 0.0013(3) 
C31 0.0294(16) 0.0234(15) 0.0276(16) 0.0037(12) 0.0012(12) -0.0036(12) 
C32 0.0303(17) 0.0301(17) 0.0307(18) 0.0054(14) 0.0012(13) -0.0030(13) 
C33 0.0323(19) 0.047(2) 0.039(2) 0.0114(17) -0.0002(15) -0.0104(16) 
C34 0.049(2) 0.042(2) 0.049(2) 0.0094(19) 0.0012(19) -0.0211(19) 
C35 0.060(3) 0.0244(18) 0.044(2) 0.0024(15) 0.0032(19) -0.0062(16) 
C36 0.043(2) 0.0243(16) 0.0331(18) 0.0020(14) 0.0042(15) -0.0036(14) 
C41 0.0246(15) 0.0184(13) 0.0250(15) 0.0019(11) 0.0051(12) 0.0040(11) 
C42 0.0302(16) 0.0210(15) 0.0290(17) -0.0008(12) 0.0029(13) 0.0002(12) 
C43 0.048(2) 0.0251(16) 0.0290(18) -0.0060(14) 0.0086(15) -0.0030(15) 
C44 0.046(2) 0.0317(18) 0.042(2) -0.0069(16) 0.0216(17) 0.0029(16) 
C45 0.0266(17) 0.0358(19) 0.049(2) 0.0012(17) 0.0102(15) 0.0035(14) 
C46 0.0281(16) 0.0271(16) 0.0306(18) -0.0005(13) 0.0008(13) 0.0025(13) 
C51 0.0284(16) 0.0293(16) 0.0238(16) 0.0059(13) 0.0009(12) 0.0037(13) 
C52 0.0344(18) 0.0342(18) 0.0277(17) 0.0020(14) 0.0015(13) -0.0005(14) 
C53 0.048(2) 0.050(2) 0.032(2) -0.0025(17) -0.0061(16) -0.0081(19) 
C54 0.050(2) 0.060(3) 0.035(2) 0.016(2) -0.0138(18) -0.001(2) 
C55 0.070(3) 0.047(2) 0.047(3) 0.013(2) -0.011(2) 0.015(2) 
C56 0.062(3) 0.0333(19) 0.035(2) 0.0028(16) -0.0083(18) 0.0092(18) 
C60 0.065(6) 0.047(4) 0.079(5) 0.005(3) 0.016(3) -0.006(3) 
Cl11 0.194(7) 0.098(4) 0.213(7) -0.049(4) 0.079(6) 0.008(4) 
Cl12 0.0534(17) 0.0375(15) 0.205(5) 0.022(2) -0.026(2) -0.0014(12) 
C61 0.065(6) 0.047(4) 0.079(5) 0.005(3) 0.016(3) -0.006(3) 
Cl13 0.100(3) 0.149(4) 0.0570(18) -0.001(2) 0.0042(17) -0.035(3) 
Cl14 0.089(2) 0.178(4) 0.0725(19) -0.048(2) 0.0343(15) -0.071(2) 
 
_geom_special_details 
; 
 All esds (except the esd in the dihedral angle between two l.s. planes) 
 are estimated using the full covariance matrix.  The cell esds are taken 
 into account individually in the estimation of esds in distances, angles 
 and torsion angles; correlations between esds in cell parameters are only 
 used when they are defined by crystal symmetry.  An approximate (isotropic) 
 treatment of cell esds is used for estimating esds involving l.s. planes. 
; 
 
loop_ 
 _geom_bond_atom_site_label_1 
 _geom_bond_atom_site_label_2 
 _geom_bond_distance 
 _geom_bond_site_symmetry_2 
 _geom_bond_publ_flag 
Ru N1 1.926(3) . ? 
Ru N24 2.049(3) . ? 
Ru N9 2.189(3) . ? 
Ru P 2.3307(8) . ? 
Ru Cl1 2.4490(8) . ? 
Ru Cl2 2.4623(8) . ? 
N1 C6 1.359(4) . ? 
N1 C2 1.365(4) . ? 
C2 C3 1.393(5) . ? 
C2 C7 1.464(5) . ? 
C3 C4 1.383(6) . ? 
C4 C5 1.393(5) . ? 
C5 C6 1.393(5) . ? 
C6 C22 1.465(4) . ? 
C7 N9 1.295(4) . ? 
C7 C8 1.516(5) . ? 
N9 C10 1.463(5) . ? 
C10 C11 1.392(6) . ? 
C10 C15 1.411(6) . ? 
C11 C12 1.394(6) . ? 
C11 C16 1.523(6) . ? 
C12 C13 1.369(7) . ? 
C13 C14 1.371(7) . ? 
C14 C15 1.391(6) . ? 
C15 C19 1.516(6) . ? 
C16 C18 1.528(7) . ? 
C16 C17 1.540(6) . ? 
C19 C20 1.524(6) . ? 
C19 C21 1.529(6) . ? 
C22 N24 1.303(4) . ? 
C22 C23 1.498(5) . ? 
N24 C25 1.480(4) . ? 
C25 C26 1.489(4) . ? 
C26 C27 1.311(5) . ? 
P C41 1.832(3) . ? 
P C51 1.839(3) . ? 
P C31 1.847(3) . ? 
C31 C32 1.389(5) . ? 
C31 C36 1.412(5) . ? 
C32 C33 1.396(5) . ? 
C33 C34 1.391(6) . ? 
C34 C35 1.378(6) . ? 
C35 C36 1.382(5) . ? 
C41 C46 1.391(4) . ? 
C41 C42 1.402(5) . ? 
C42 C43 1.393(5) . ? 
C43 C44 1.383(6) . ? 
C44 C45 1.378(6) . ? 
C45 C46 1.394(5) . ? 
C51 C52 1.386(5) . ? 
C51 C56 1.395(5) . ? 
C52 C53 1.392(5) . ? 
C53 C54 1.370(6) . ? 
C54 C55 1.393(7) . ? 
C55 C56 1.384(6) . ? 
C60 Cl11 1.760(8) . ? 
C60 Cl12 1.762(9) . ? 
C61 Cl13 1.759(7) . ? 
C61 Cl14 1.764(9) . ? 
 
loop_ 
 _geom_angle_atom_site_label_1 
 _geom_angle_atom_site_label_2 
 _geom_angle_atom_site_label_3 
 _geom_angle 
 _geom_angle_site_symmetry_1 
 _geom_angle_site_symmetry_3 
 _geom_angle_publ_flag 
N1 Ru N24 78.87(11) . . ? 
N1 Ru N9 77.91(11) . . ? 
N24 Ru N9 156.51(11) . . ? 
N1 Ru P 100.88(8) . . ? 
N24 Ru P 88.33(7) . . ? 
N9 Ru P 99.47(8) . . ? 
N1 Ru Cl1 169.07(8) . . ? 
N24 Ru Cl1 94.95(8) . . ? 
N9 Ru Cl1 107.38(8) . . ? 
P Ru Cl1 87.84(3) . . ? 
N1 Ru Cl2 82.44(8) . . ? 
N24 Ru Cl2 84.95(7) . . ? 
N9 Ru Cl2 88.54(8) . . ? 
P Ru Cl2 171.80(3) . . ? 
Cl1 Ru Cl2 88.07(3) . . ? 
C6 N1 C2 120.9(3) . . ? 
C6 N1 Ru 118.5(2) . . ? 
C2 N1 Ru 118.8(2) . . ? 
N1 C2 C3 119.8(3) . . ? 
N1 C2 C7 113.3(3) . . ? 
C3 C2 C7 126.9(3) . . ? 
C4 C3 C2 119.4(3) . . ? 
C3 C4 C5 120.5(3) . . ? 
C4 C5 C6 118.5(4) . . ? 
N1 C6 C5 120.7(3) . . ? 
N1 C6 C22 112.8(3) . . ? 
C5 C6 C22 125.9(3) . . ? 
N9 C7 C2 117.0(3) . . ? 
N9 C7 C8 124.9(3) . . ? 
C2 C7 C8 118.0(3) . . ? 
C7 N9 C10 118.0(3) . . ? 
C7 N9 Ru 110.5(2) . . ? 
C10 N9 Ru 131.2(2) . . ? 
C11 C10 C15 121.2(4) . . ? 
C11 C10 N9 119.8(3) . . ? 
C15 C10 N9 119.0(3) . . ? 
C10 C11 C12 117.8(4) . . ? 
C10 C11 C16 123.1(4) . . ? 
C12 C11 C16 119.0(4) . . ? 
C13 C12 C11 122.0(4) . . ? 
C12 C13 C14 119.2(4) . . ? 
C13 C14 C15 122.0(4) . . ? 
C14 C15 C10 117.6(4) . . ? 
C14 C15 C19 119.8(4) . . ? 
C10 C15 C19 122.7(3) . . ? 
C11 C16 C18 111.4(4) . . ? 
C11 C16 C17 110.5(4) . . ? 
C18 C16 C17 110.2(4) . . ? 
C15 C19 C20 114.7(4) . . ? 
C15 C19 C21 112.7(4) . . ? 
C20 C19 C21 108.3(4) . . ? 
N24 C22 C6 114.1(3) . . ? 
N24 C22 C23 125.0(3) . . ? 
C6 C22 C23 120.7(3) . . ? 
C22 N24 C25 119.2(3) . . ? 
C22 N24 Ru 115.6(2) . . ? 
C25 N24 Ru 125.0(2) . . ? 
N24 C25 C26 110.9(3) . . ? 
C27 C26 C25 124.1(4) . . ? 
C41 P C51 101.86(15) . . ? 
C41 P C31 99.97(15) . . ? 
C51 P C31 104.06(15) . . ? 
C41 P Ru 111.18(10) . . ? 
C51 P Ru 117.38(11) . . ? 
C31 P Ru 119.67(11) . . ? 
C32 C31 C36 117.9(3) . . ? 
C32 C31 P 120.8(3) . . ? 
C36 C31 P 121.2(3) . . ? 
C31 C32 C33 121.2(3) . . ? 
C34 C33 C32 119.6(4) . . ? 
C35 C34 C33 120.0(3) . . ? 
C34 C35 C36 120.5(4) . . ? 
C35 C36 C31 120.8(4) . . ? 
C46 C41 C42 118.8(3) . . ? 
C46 C41 P 121.4(2) . . ? 
C42 C41 P 119.5(2) . . ? 
C43 C42 C41 120.6(3) . . ? 
C44 C43 C42 119.6(3) . . ? 
C45 C44 C43 120.3(3) . . ? 
C44 C45 C46 120.3(3) . . ? 
C41 C46 C45 120.3(3) . . ? 
C52 C51 C56 118.3(3) . . ? 
C52 C51 P 120.1(2) . . ? 
C56 C51 P 121.6(3) . . ? 
C51 C52 C53 121.0(3) . . ? 
C54 C53 C52 120.2(4) . . ? 
C53 C54 C55 119.7(4) . . ? 
C56 C55 C54 120.1(4) . . ? 
C55 C56 C51 120.8(4) . . ? 
Cl11 C60 Cl12 104.3(6) . . ? 
Cl13 C61 Cl14 112.2(6) . . ? 
 
loop_ 
 _geom_torsion_atom_site_label_1 
 _geom_torsion_atom_site_label_2 
 _geom_torsion_atom_site_label_3 
 _geom_torsion_atom_site_label_4 
 _geom_torsion 
 _geom_torsion_site_symmetry_1 
 _geom_torsion_site_symmetry_2 
 _geom_torsion_site_symmetry_3 
 _geom_torsion_site_symmetry_4 
 _geom_torsion_publ_flag 
N24 Ru N1 C6 -1.4(2) . . . . ? 
N9 Ru N1 C6 -177.9(2) . . . . ? 
P Ru N1 C6 84.7(2) . . . . ? 
Cl1 Ru N1 C6 -57.7(5) . . . . ? 
Cl2 Ru N1 C6 -87.7(2) . . . . ? 
N24 Ru N1 C2 163.2(2) . . . . ? 
N9 Ru N1 C2 -13.2(2) . . . . ? 
P Ru N1 C2 -110.7(2) . . . . ? 
Cl1 Ru N1 C2 106.9(4) . . . . ? 
Cl2 Ru N1 C2 76.9(2) . . . . ? 
C6 N1 C2 C3 -5.0(5) . . . . ? 
Ru N1 C2 C3 -169.3(3) . . . . ? 
C6 N1 C2 C7 175.1(3) . . . . ? 
Ru N1 C2 C7 10.8(4) . . . . ? 
N1 C2 C3 C4 0.7(5) . . . . ? 
C7 C2 C3 C4 -179.4(3) . . . . ? 
C2 C3 C4 C5 2.1(6) . . . . ? 
C3 C4 C5 C6 -0.7(5) . . . . ? 
C2 N1 C6 C5 6.4(5) . . . . ? 
Ru N1 C6 C5 170.8(2) . . . . ? 
C2 N1 C6 C22 -164.9(3) . . . . ? 
Ru N1 C6 C22 -0.6(3) . . . . ? 
C4 C5 C6 N1 -3.5(5) . . . . ? 
C4 C5 C6 C22 166.6(3) . . . . ? 
N1 C2 C7 N9 2.4(5) . . . . ? 
C3 C2 C7 N9 -177.4(3) . . . . ? 
N1 C2 C7 C8 -174.8(3) . . . . ? 
C3 C2 C7 C8 5.3(6) . . . . ? 
C2 C7 N9 C10 172.8(3) . . . . ? 
C8 C7 N9 C10 -10.2(5) . . . . ? 
C2 C7 N9 Ru -12.2(4) . . . . ? 
C8 C7 N9 Ru 164.7(3) . . . . ? 
N1 Ru N9 C7 13.7(2) . . . . ? 
N24 Ru N9 C7 4.9(4) . . . . ? 
P Ru N9 C7 112.9(2) . . . . ? 
Cl1 Ru N9 C7 -156.4(2) . . . . ? 
Cl2 Ru N9 C7 -68.8(2) . . . . ? 
N1 Ru N9 C10 -172.2(3) . . . . ? 
N24 Ru N9 C10 178.9(3) . . . . ? 
P Ru N9 C10 -73.0(3) . . . . ? 
Cl1 Ru N9 C10 17.7(3) . . . . ? 
Cl2 Ru N9 C10 105.2(3) . . . . ? 
C7 N9 C10 C11 93.5(4) . . . . ? 
Ru N9 C10 C11 -80.2(4) . . . . ? 
C7 N9 C10 C15 -87.0(4) . . . . ? 
Ru N9 C10 C15 99.3(4) . . . . ? 
C15 C10 C11 C12 -4.0(6) . . . . ? 
N9 C10 C11 C12 175.5(3) . . . . ? 
C15 C10 C11 C16 172.9(4) . . . . ? 
N9 C10 C11 C16 -7.7(5) . . . . ? 
C10 C11 C12 C13 1.8(7) . . . . ? 
C16 C11 C12 C13 -175.2(4) . . . . ? 
C11 C12 C13 C14 1.2(7) . . . . ? 
C12 C13 C14 C15 -2.1(7) . . . . ? 
C13 C14 C15 C10 -0.1(6) . . . . ? 
C13 C14 C15 C19 -179.8(4) . . . . ? 
C11 C10 C15 C14 3.1(5) . . . . ? 
N9 C10 C15 C14 -176.3(3) . . . . ? 
C11 C10 C15 C19 -177.1(3) . . . . ? 
N9 C10 C15 C19 3.4(5) . . . . ? 
C10 C11 C16 C18 119.5(4) . . . . ? 
C12 C11 C16 C18 -63.6(5) . . . . ? 
C10 C11 C16 C17 -117.6(5) . . . . ? 
C12 C11 C16 C17 59.2(6) . . . . ? 
C14 C15 C19 C20 31.6(5) . . . . ? 
C10 C15 C19 C20 -148.1(4) . . . . ? 
C14 C15 C19 C21 -93.0(5) . . . . ? 
C10 C15 C19 C21 87.3(5) . . . . ? 
N1 C6 C22 N24 3.6(4) . . . . ? 
C5 C6 C22 N24 -167.2(3) . . . . ? 
N1 C6 C22 C23 -179.6(3) . . . . ? 
C5 C6 C22 C23 9.6(5) . . . . ? 
C6 C22 N24 C25 170.3(3) . . . . ? 
C23 C22 N24 C25 -6.4(5) . . . . ? 
C6 C22 N24 Ru -4.8(3) . . . . ? 
C23 C22 N24 Ru 178.5(3) . . . . ? 
N1 Ru N24 C22 3.5(2) . . . . ? 
N9 Ru N24 C22 12.3(4) . . . . ? 
P Ru N24 C22 -97.9(2) . . . . ? 
Cl1 Ru N24 C22 174.4(2) . . . . ? 
Cl2 Ru N24 C22 86.8(2) . . . . ? 
N1 Ru N24 C25 -171.2(2) . . . . ? 
N9 Ru N24 C25 -162.4(2) . . . . ? 
P Ru N24 C25 87.3(2) . . . . ? 
Cl1 Ru N24 C25 -0.3(2) . . . . ? 
Cl2 Ru N24 C25 -88.0(2) . . . . ? 
C22 N24 C25 C26 -84.5(4) . . . . ? 
Ru N24 C25 C26 90.1(3) . . . . ? 
N24 C25 C26 C27 133.0(4) . . . . ? 
N1 Ru P C41 -103.35(14) . . . . ? 
N24 Ru P C41 -25.02(14) . . . . ? 
N9 Ru P C41 177.26(14) . . . . ? 
Cl1 Ru P C41 70.00(12) . . . . ? 
Cl2 Ru P C41 9.9(3) . . . . ? 
N1 Ru P C51 139.99(15) . . . . ? 
N24 Ru P C51 -141.68(14) . . . . ? 
N9 Ru P C51 60.60(15) . . . . ? 
Cl1 Ru P C51 -46.66(12) . . . . ? 
Cl2 Ru P C51 -106.8(2) . . . . ? 
N1 Ru P C31 12.39(15) . . . . ? 
N24 Ru P C31 90.72(14) . . . . ? 
N9 Ru P C31 -67.00(15) . . . . ? 
Cl1 Ru P C31 -174.26(12) . . . . ? 
Cl2 Ru P C31 125.6(2) . . . . ? 
C41 P C31 C32 147.0(3) . . . . ? 
C51 P C31 C32 -108.0(3) . . . . ? 
Ru P C31 C32 25.5(3) . . . . ? 
C41 P C31 C36 -36.7(3) . . . . ? 
C51 P C31 C36 68.3(3) . . . . ? 
Ru P C31 C36 -158.2(2) . . . . ? 
C36 C31 C32 C33 -2.4(5) . . . . ? 
P C31 C32 C33 174.0(3) . . . . ? 
C31 C32 C33 C34 1.6(6) . . . . ? 
C32 C33 C34 C35 0.3(6) . . . . ? 
C33 C34 C35 C36 -1.4(6) . . . . ? 
C34 C35 C36 C31 0.5(6) . . . . ? 
C32 C31 C36 C35 1.4(5) . . . . ? 
P C31 C36 C35 -175.0(3) . . . . ? 
C51 P C41 C46 32.7(3) . . . . ? 
C31 P C41 C46 139.5(3) . . . . ? 
Ru P C41 C46 -93.1(3) . . . . ? 
C51 P C41 C42 -153.6(3) . . . . ? 
C31 P C41 C42 -46.8(3) . . . . ? 
Ru P C41 C42 80.6(3) . . . . ? 
C46 C41 C42 C43 1.1(5) . . . . ? 
P C41 C42 C43 -172.8(2) . . . . ? 
C41 C42 C43 C44 -1.8(5) . . . . ? 
C42 C43 C44 C45 0.7(5) . . . . ? 
C43 C44 C45 C46 1.1(6) . . . . ? 
C42 C41 C46 C45 0.7(5) . . . . ? 
P C41 C46 C45 174.5(3) . . . . ? 
C44 C45 C46 C41 -1.8(5) . . . . ? 
C41 P C51 C52 -125.1(3) . . . . ? 
C31 P C51 C52 131.4(3) . . . . ? 
Ru P C51 C52 -3.4(3) . . . . ? 
C41 P C51 C56 53.7(3) . . . . ? 
C31 P C51 C56 -49.8(3) . . . . ? 
Ru P C51 C56 175.4(3) . . . . ? 
C56 C51 C52 C53 -0.7(5) . . . . ? 
P C51 C52 C53 178.2(3) . . . . ? 
C51 C52 C53 C54 -0.8(6) . . . . ? 
C52 C53 C54 C55 1.4(7) . . . . ? 
C53 C54 C55 C56 -0.6(7) . . . . ? 
C54 C55 C56 C51 -0.9(7) . . . . ? 
C52 C51 C56 C55 1.5(6) . . . . ? 
P C51 C56 C55 -177.3(4) . . . . ? 
 
_diffrn_measured_fraction_theta_max    0.978 
_diffrn_reflns_theta_full              28.23 
_diffrn_measured_fraction_theta_full   0.978 
_refine_diff_density_max    2.304 
_refine_diff_density_min   -0.820 
_refine_diff_density_rms    0.180 
